# Supplementary material for: DNA methylation profile of tissue-dependent and differentially methylated regions (T-DMRs) in mouse promoter regions demonstrating tissue-specific gene expression
Source: HighWire-hosted journal article supplement (doi:10.1101/gr.074070.107), 2008-10-29
Supplement: supplementary_datas.pdf [file supplementary_datas.pdf]

**A**

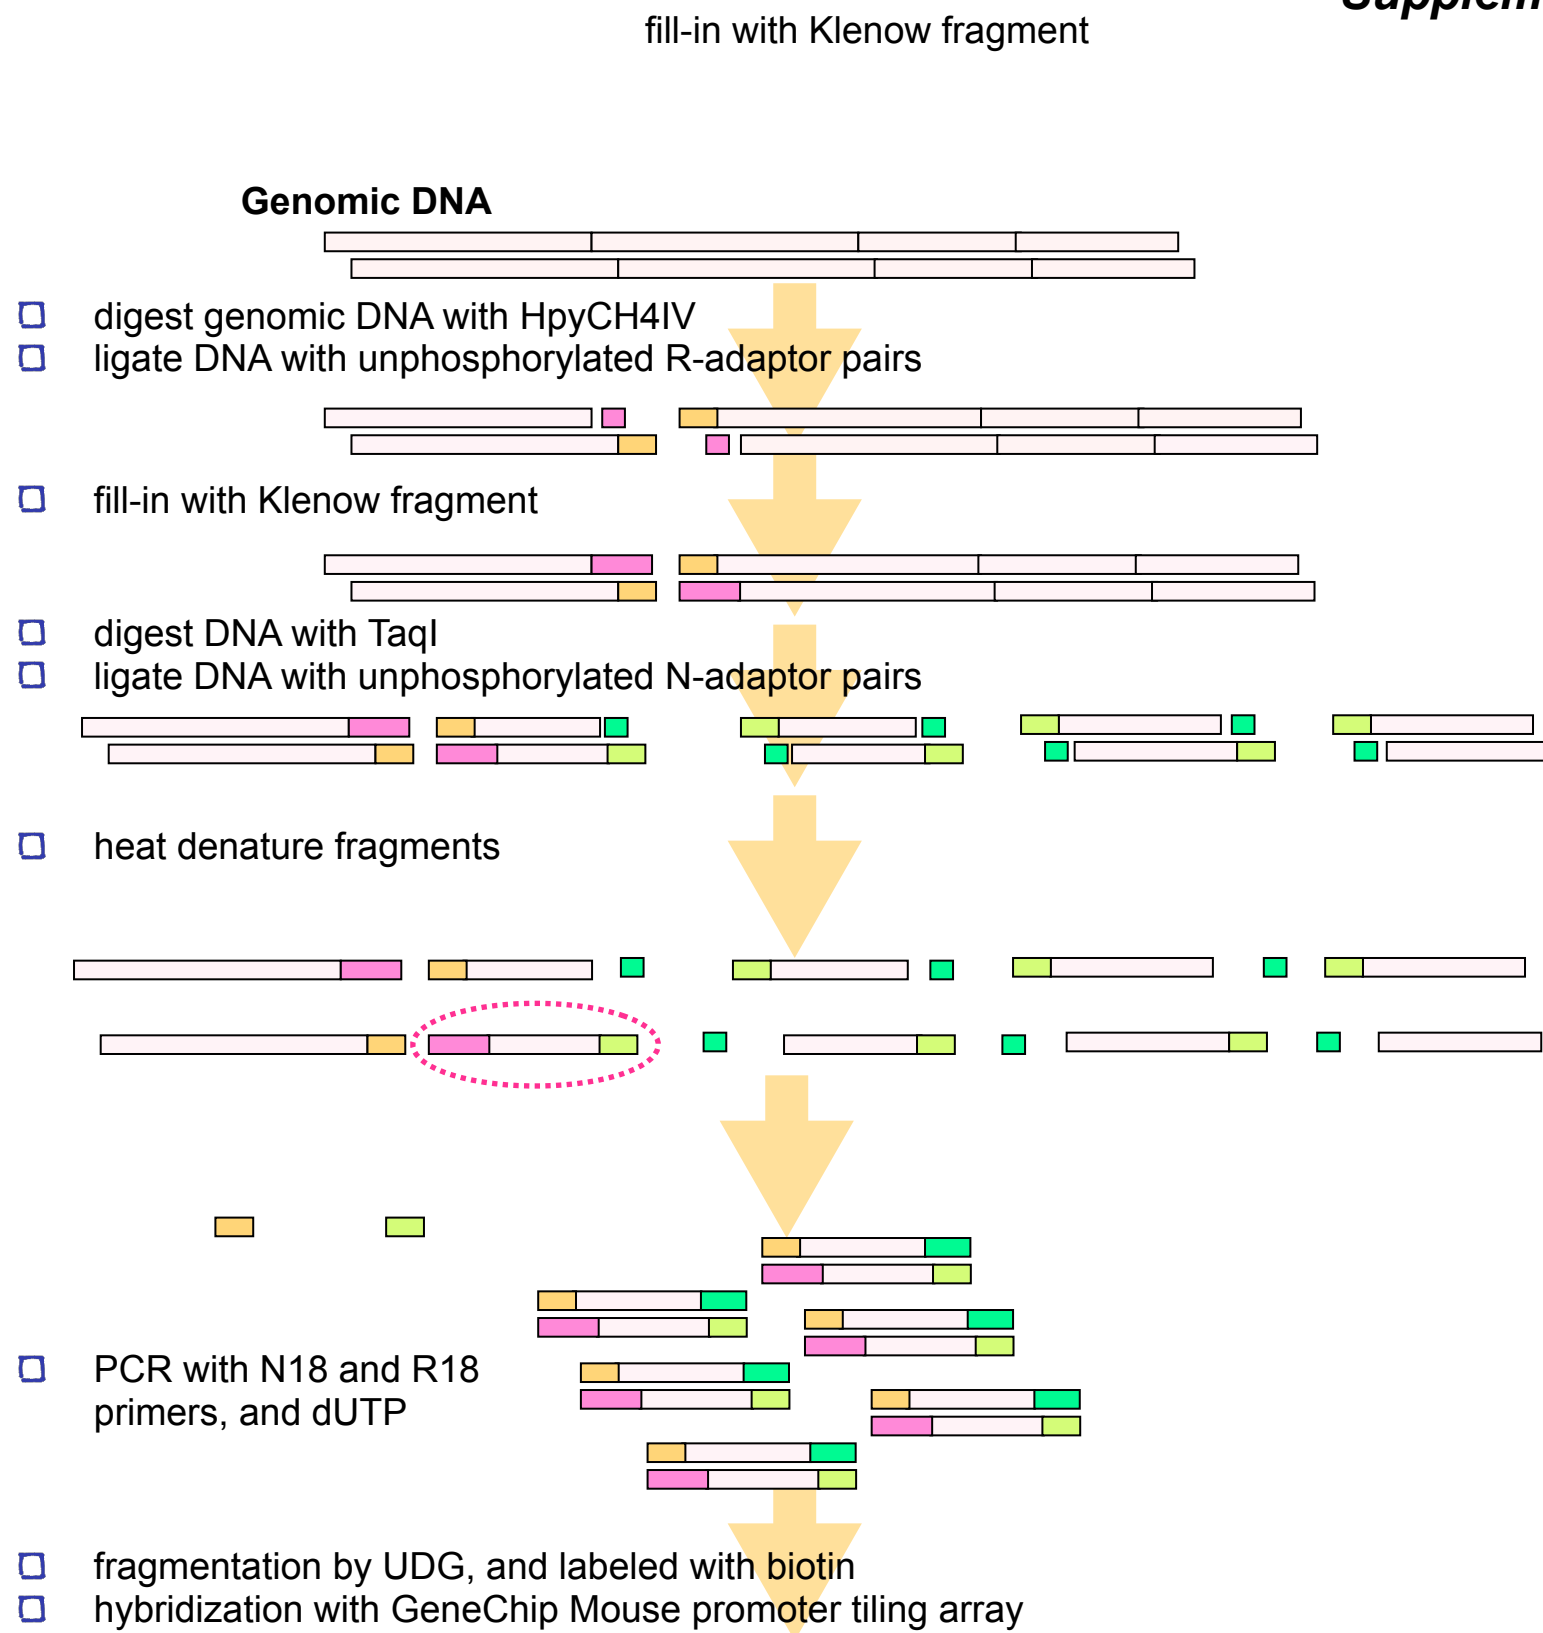

**B**

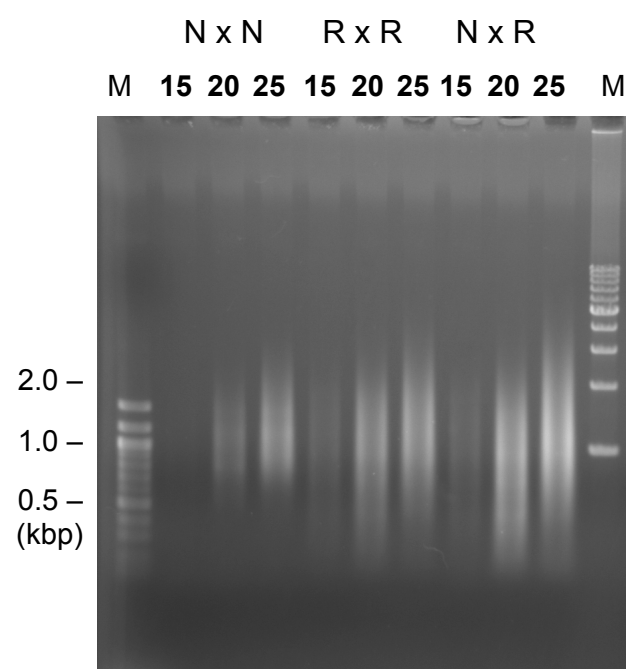

**C**

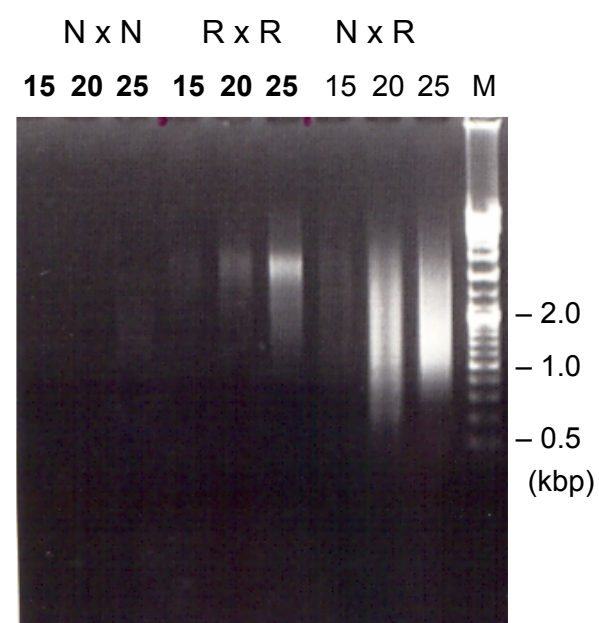

**D**

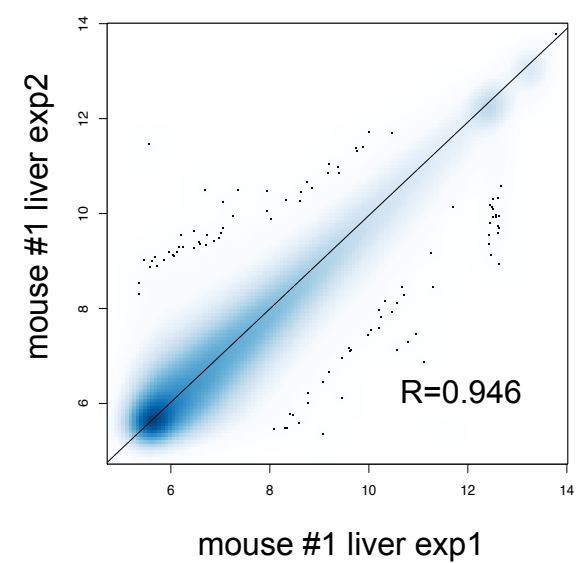

Supplementary Figure S2

**A**

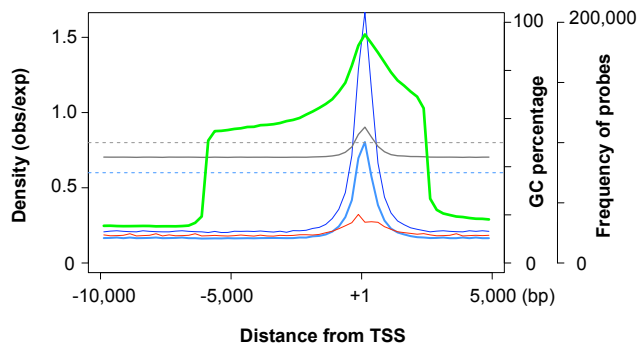

**B**

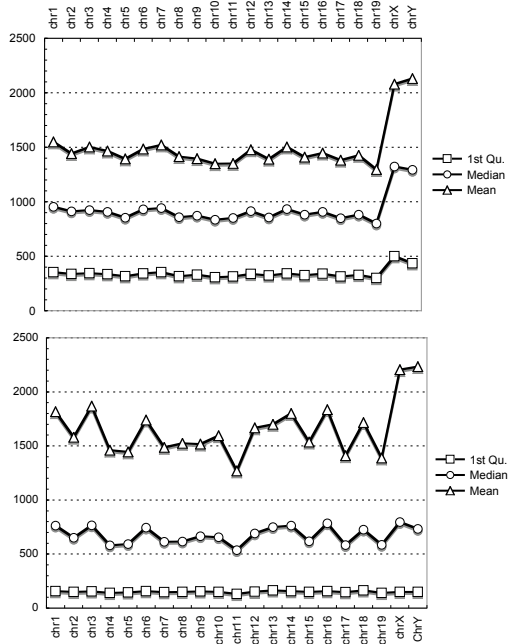



A

## CHIP-CHIP

| Entrez ID     | Symbol               |
|---------------|----------------------|
| HNF1A CGI     |                      |
| 14194         | <i>Fh1</i>           |
| 56794         | <i>Hacl1</i>         |
| 16432         | <i>Itm2b</i>         |
| HFN1A non-CGI |                      |
| 16790         | <i>Anpep</i>         |
| 55938         | <i>Apom</i>          |
| 15112         | <i>Hao1</i>          |
| 15378         | <i>Hnf4a</i>         |
| 15486         | <i>Hsd17b2</i>       |
| 16006         | <i>Igfbp1</i>        |
| 17777         | <i>Mttp</i>          |
| 100163        | <i>Pafah2</i>        |
| 20704         | <i>Serpina1e</i>     |
| 12401         | <i>Serpina6</i>      |
| 27219         | <i>Sgk2</i>          |
| 72094         | <i>Ugt2a3</i>        |
| CGI           |                      |
| 66540         | <i>3110001A13Rik</i> |
| 11637         | <i>Ak2</i>           |
| 224727        | <i>Bat3</i>          |
| 66205         | <i>Cd302</i>         |
| 28126         | <i>D13Wsu177e</i>    |
| 76843         | <i>Dtl</i>           |
| 27395         | <i>Mrpl15</i>        |
| 17750         | <i>Mt2</i>           |
| 17966         | <i>Nbr1</i>          |
| 18510         | <i>Pax8</i>          |
| 215615        | <i>Rnpep</i>         |
| 20019         | <i>Rpo1-4</i>        |
| 269831        | <i>Tspan12</i>       |
| 217109        | <i>Utp18</i>         |
| 56490         | <i>Zbtb20</i>        |
| non-CGI       |                      |
| 11606         | <i>Agt</i>           |
| 11699         | <i>Ambp</i>          |
| 11818         | <i>Apoh</i>          |
| 242557        | <i>Atg4c</i>         |
| 12263         | <i>C2</i>            |
| 110382        | <i>C8b</i>           |
| 13809         | <i>Enpep</i>         |
| 14373         | <i>G0s2</i>          |
| 15458         | <i>Hpx</i>           |
| 23957         | <i>Nr0b2</i>         |
| 18534         | <i>Pck1</i>          |
| 11905         | <i>Serpinc1</i>      |
| 218103        | <i>Slc17a2</i>       |

B

## HNF-1A motif

## CGI genes

| Entrez ID | Symbol               |
|-----------|----------------------|
| 66665     | <i>5730528L13Rik</i> |
| 77803     | <i>A930021C24Rik</i> |
| 70317     | <i>Arl16</i>         |
| 11899     | <i>Astn1</i>         |
| 71132     | <i>Cabyr</i>         |
| 234388    | <i>Ccdc124</i>       |
| 27784     | <i>Commd8</i>        |
| 352968    | <i>D830050J10Rik</i> |
| 13143     | <i>Dapk2</i>         |
| 13178     | <i>Dck</i>           |
| 13511     | <i>Dsg2</i>          |
| 13518     | <i>Dst</i>           |
| 192193    | <i>Edem1</i>         |
| 13839     | <i>Epha5</i>         |
| 13885     | <i>Esd</i>           |
| 14048     | <i>Eya1</i>          |
| 384009    | <i>Glpr2</i>         |
| 216871    | <i>Gltpd2</i>        |
| 14732     | <i>Gpam</i>          |
| 14782     | <i>Gsr</i>           |
| 15199     | <i>Hebp1</i>         |
| 15473     | <i>Hrsp12</i>        |
| 207683    | <i>Igsf11</i>        |
| 16949     | <i>Loxl1</i>         |
| 116748    | <i>Lsm10</i>         |
| 212679    | <i>Mars2</i>         |
| 108645    | <i>Mat2b</i>         |
| 230125    | <i>Mcart1</i>        |
| 17434     | <i>Mocs2</i>         |
| 270685    | <i>Mthfd1l</i>       |
| 23959     | <i>Nt5e</i>          |
| 18242     | <i>Oat</i>           |
| 231602    | <i>P2rx2</i>         |
| 75552     | <i>Paqr9</i>         |
| 18769     | <i>Pkig</i>          |
| 263406    | <i>Plekhg3</i>       |
| 22038     | <i>Plscr1</i>        |
| 217734    | <i>Pomt2</i>         |
| 212627    | <i>Prpsap2</i>       |
| 14083     | <i>Ptk2</i>          |
| 75212     | <i>Rnf121</i>        |
| 54170     | <i>Rragc</i>         |
| 110809    | <i>Sfrs1</i>         |
| 20384     | <i>Sfrs5</i>         |
| 20425     | <i>Shmt1</i>         |
| 74011     | <i>Slc25a27</i>      |
| 109108    | <i>Slc30a9</i>       |
| 58246     | <i>Slc35b4</i>       |
| 240726    | <i>Slco5a1</i>       |
| 66616     | <i>Snx9</i>          |
| 20660     | <i>Sorl1</i>         |
| 234857    | <i>Spire2</i>        |
| 52331     | <i>Stbd1</i>         |
| 71954     | <i>Suds3</i>         |
| 381085    | <i>Tbc1d22b</i>      |
| 232078    | <i>Thnsl2</i>        |
| 235300    | <i>Tmem136</i>       |
| 56407     | <i>Trpc4ap</i>       |
| 209584    | <i>Tyw3</i>          |
| 56491     | <i>Vapb</i>          |
| 52357     | <i>Wwc2</i>          |

## non-CGI genes

| Entrez ID | Symbol               | Entrez ID | Symbol                    |
|-----------|----------------------|-----------|---------------------------|
| 67432     | <i>0610010D20Rik</i> | 83379     | <i>Klb</i>                |
| 71775     | <i>1300017J02Rik</i> | 259301    | <i>Leap2</i>              |
| 67119     | <i>2510048L02Rik</i> | 64898     | <i>Lpin2</i>              |
| 109280    | <i>9330176C04Rik</i> | 17288     | <i>Mep1b</i>              |
| 210373    | <i>A530095I07Rik</i> | 69826     | <i>Ms4a10</i>             |
| 93732     | <i>Acox2</i>         | 17700     | <i>Mstn</i>               |
| 11431     | <i>Acp1</i>          | 17882     | <i>Myh2</i>               |
| 233799    | <i>Acsm2</i>         | 338370    | <i>Nalcn</i>              |
| 280662    | <i>Afm</i>           | 18105     | <i>Nqo2</i>               |
| 11576     | <i>Afp</i>           | 22259     | <i>Nr1h3</i>              |
| 98870     | <i>AI182371</i>      | 18171     | <i>Nr1i2</i>              |
| 11727     | <i>Ang</i>           | 67528     | <i>Nudt7</i>              |
| 72074     | <i>Anks4b</i>        | 258623    | <i>Olfr123</i>            |
| 69787     | <i>Anxa13</i>        | 259162    | <i>Olfr427</i>            |
| 11807     | <i>Apoa2</i>         | 18346     | <i>Olfr47</i>             |
| 231287    | <i>Atp10d</i>        | 258731    | <i>Olfr491</i>            |
| 26877     | <i>B3galt1</i>       | 258307    | <i>Olfr493</i>            |
| 545366    | <i>BC026782</i>      | 259126    | <i>Olfr623</i>            |
| 170752    | <i>Bcdo2</i>         | 258934    | <i>Olfr802</i>            |
| 228662    | <i>Btbd3</i>         | 258812    | <i>Olfr923</i>            |
| 230558    | <i>C8a</i>           | 628813    | <i>OTTMUSG00000000997</i> |
| 12352     | <i>Car5a</i>         | 13180     | <i>Pcbd1</i>              |
| 30952     | <i>Cngb3</i>         | 110385    | <i>Pde4c</i>              |
| 239447    | <i>Colec10</i>       | 18815     | <i>Plg</i>                |
| 71791     | <i>Cpa4</i>          | 67000     | <i>Prl3a1</i>             |
| 70062     | <i>Ctag2</i>         | 56189     | <i>Prodh2</i>             |
| 107869    | <i>Cth</i>           | 30053     | <i>Reg3d</i>              |
| 15945     | <i>Cxcl10</i>        | 192658    | <i>Rfpl4</i>              |
| 107141    | <i>Cyp2c50</i>       | 19733     | <i>Rgn</i>                |
| 433247    | <i>Cyp2c68</i>       | 12309     | <i>S100g</i>              |
| 226105    | <i>Cyp2c70</i>       | 20209     | <i>Saa2</i>               |
| 13909     | <i>EG13909</i>       | 20700     | <i>Serpina1a</i>          |
| 240327    | <i>EG240327</i>      | 20701     | <i>Serpina1b</i>          |
| 14060     | <i>F13b</i>          | 20702     | <i>Serpina1c</i>          |
| 544763    | <i>F830116E18Rik</i> | 20703     | <i>Serpina1d</i>          |
| 14080     | <i>Fabp1</i>         | 20388     | <i>Sftpb</i>              |
| 14161     | <i>Fga</i>           | 20495     | <i>Slc12a1</i>            |
| 110135    | <i>Fgb</i>           | 319848    | <i>Slc17a4</i>            |
| 240894    | <i>Fmo9</i>          | 320718    | <i>Slc26a9</i>            |
| 14317     | <i>Ftcd</i>          | 28253     | <i>Slco1b2</i>            |
| 14538     | <i>Gcnt2</i>         | 20730     | <i>Spink3</i>             |
| 14618     | <i>Gjb1</i>          | 100689    | <i>Spon2</i>              |
| 66283     | <i>Gkn1</i>          | 84112     | <i>Sucnr1</i>             |
| 217674    | <i>Gphb5</i>         | 69083     | <i>Sult1c2</i>            |
| 107022    | <i>Gramd3</i>        | 72003     | <i>Synpr</i>              |
| 14823     | <i>Grm8</i>          | 21391     | <i>Tbxas1</i>             |
| 226243    | <i>Habp2</i>         | 21789     | <i>Tfpi2</i>              |
| 56185     | <i>Hao3</i>          | 66261     | <i>Tm4sf20</i>            |
| 54426     | <i>Hgfac</i>         | 217203    | <i>Tmem106a</i>           |
| 387510    | <i>Ifnk</i>          | 22139     | <i>Tr</i>                 |
| 16171     | <i>Il17a</i>         | 76654     | <i>Upp2</i>               |
| 16552     | <i>Kif12</i>         | 360216    | <i>Zranb1</i>             |

A

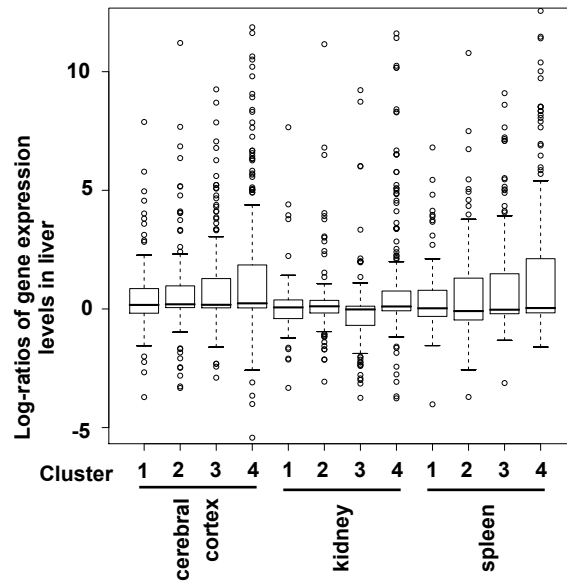

B

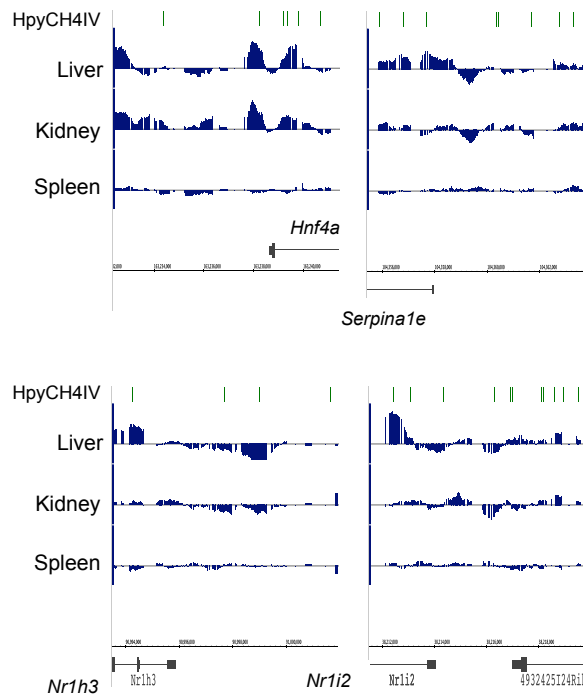

Supplementary Figure S6

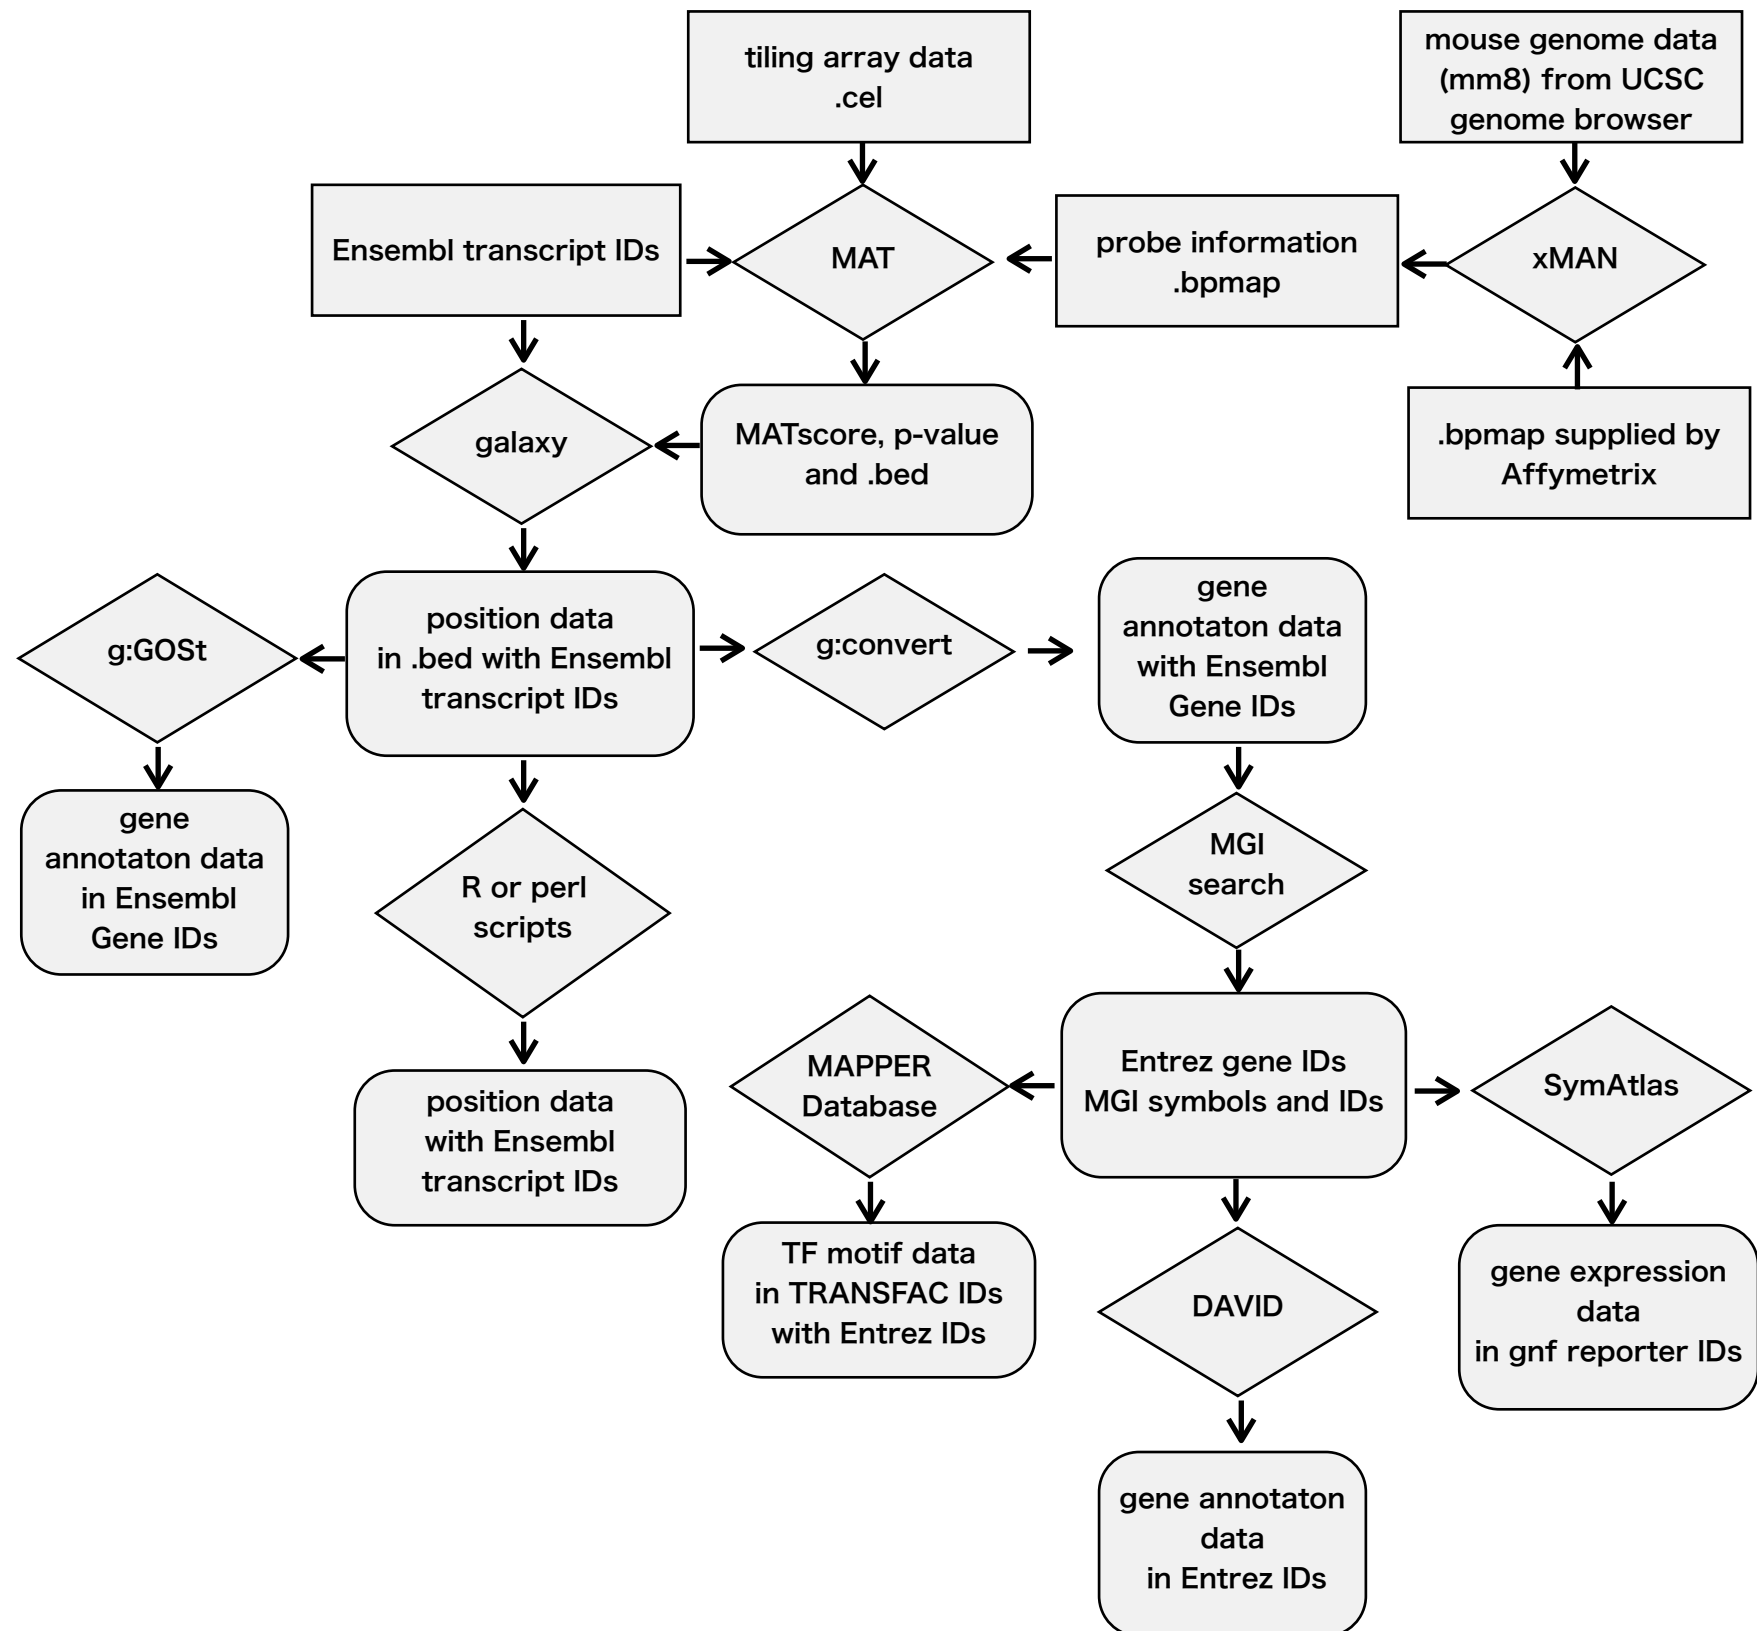

Supplementary Table S1.

Distribution of probes and ENSEMBL transcripts along mouse chromosomes

|       | probes    |      | ENSEMBL transcript Ids |      |
|-------|-----------|------|------------------------|------|
|       | number    | %    | number                 | %    |
| chr1  | 264,858   | 6.06 | 1,738                  | 5.77 |
| chr2  | 359,931   | 8.23 | 2,481                  | 8.24 |
| chr3  | 210,691   | 4.82 | 1,430                  | 4.75 |
| chr4  | 279,996   | 6.4  | 1,861                  | 6.18 |
| chr5  | 248,152   | 5.67 | 1,761                  | 5.85 |
| chr6  | 240,327   | 5.5  | 1,586                  | 5.27 |
| chr7  | 352,011   | 8.05 | 2,572                  | 8.54 |
| chr8  | 199,046   | 4.55 | 1,440                  | 4.78 |
| chr9  | 229,342   | 5.24 | 1,608                  | 5.34 |
| chr10 | 200,262   | 4.58 | 1,368                  | 4.54 |
| chr11 | 311,061   | 7.11 | 2,458                  | 8.16 |
| chr12 | 153,099   | 3.5  | 1,047                  | 3.48 |
| chr13 | 171,579   | 3.92 | 1,161                  | 3.85 |
| chr14 | 170,459   | 3.9  | 1,167                  | 3.87 |
| chr15 | 168,974   | 3.86 | 1,104                  | 3.67 |
| chr16 | 137,301   | 3.14 | 930                    | 3.09 |
| chr17 | 194,934   | 4.46 | 1,444                  | 4.79 |
| chr18 | 116,740   | 2.67 | 737                    | 2.45 |
| chr19 | 140,689   | 3.22 | 969                    | 3.22 |
| chrX  | 218,003   | 4.98 | 1,228                  | 4.08 |
| chrY  | 6,098     | 0    | 30                     | 0.1  |
| total | 4,373,553 |      | 30,120                 |      |

Probes were remapped to the mm8 mouse genome assembly by xMAN.

The tiling probes were originally designed to cover 33,559 ENSEMBL genes located on the mouse genome assembly of mm5.

**Supplementary Table S2. Annotation analysis of genes with liver T-DMRtags**

| p-values of<br>g:GOST<br>analysis | Num-<br>ber of<br>genes | Percen-<br>tage of<br>no-CGI | $\chi$ square<br>test*<br><br>(p-values)      | Ontology<br>Type** | Term                                           | DAVID <sup>#</sup> |
|-----------------------------------|-------------------------|------------------------------|-----------------------------------------------|--------------------|------------------------------------------------|--------------------|
| $3.06 \times 10^{-9}$             | 94                      | 62.80%                       | $7.3 \times 10^{-2}$                          | GO:BP              | lipid metabolic process                        | NC                 |
| $4.06 \times 10^{-9}$             | 82                      | 63.40%                       | $7.3 \times 10^{-2}$                          |                    | cellular lipid metabolic process               | NC                 |
| $1.89 \times 10^{-6}$             | 106                     | 59.40%                       | $2.2 \times 10^{-1}$                          |                    | response to stress                             |                    |
| $1.41 \times 10^{-6}$             | 80                      | 60.00%                       | $2.4 \times 10^{-1}$                          |                    | generation of precursor metabolites and energy | NC                 |
| $1.40 \times 10^{-9}$             | 81                      | 53.10%                       | $9.7 \times 10^{-1}$                          |                    | organic acid metabolic process                 | NC                 |
| $2.91 \times 10^{-9}$             | 80                      | 53.80%                       | $9.4 \times 10^{-1}$                          |                    | carboxylic acid metabolic process              | NC                 |
| $4.98 \times 10^{-6}$             | 38                      | 68.40%                       | $6.5 \times 10^{-2}$                          |                    | monocarboxylic acid metabolic process          |                    |
| $1.02 \times 10^{-6}$             | 19                      | 52.60%                       | $9.5 \times 10^{-1}$                          | GO:MF              | vitamin binding                                | NC                 |
| $1.59 \times 10^{-6}$             | 31                      | 48.40%                       | $5.9 \times 10^{-1}$                          |                    | cofactor binding                               | NC                 |
| $4.47 \times 10^{-6}$             | 16                      | 68.80%                       | $2.2 \times 10^{-1}$                          |                    | FAD binding                                    | NC                 |
| $5.97 \times 10^{-8}$             | 28                      | 71.40%                       | $5.6 \times 10^{-2}$                          | TF                 | M00790_1 (HNF-1)                               | n.d.               |
| <b>biased to no CGI genes</b>     |                         |                              |                                               |                    |                                                |                    |
| $4.85 \times 10^{-6}$             | 69                      | 81.20%                       | <u><b><math>5.2 \times 10^{-6}</math></b></u> | GO:BP              | defense response                               |                    |
| $1.96 \times 10^{-10}$            | 64                      | 84.40%                       | <u><b><math>9.4 \times 10^{-7}</math></b></u> |                    | response to wounding                           | NC                 |
| $1.18 \times 10^{-8}$             | 48                      | 83.30%                       | <u><b><math>3.8 \times 10^{-5}</math></b></u> |                    | inflammatory response                          |                    |
| $1.38 \times 10^{-8}$             | 23                      | 95.70%                       | <u><b><math>5.2 \times 10^{-5}</math></b></u> |                    | acute inflammatory response                    |                    |
| $9.46 \times 10^{-9}$             | 253                     | 66.00%                       | <u><b><math>1.4 \times 10^{-4}</math></b></u> | GO:CC              | extracellular region                           | NC                 |
| $2.39 \times 10^{-8}$             | 234                     | 65.80%                       | <u><b><math>3.0 \times 10^{-4}</math></b></u> |                    | extracellular region part                      |                    |
| $2.08 \times 10^{-8}$             | 224                     | 66.50%                       | <u><b><math>1.8 \times 10^{-4}</math></b></u> |                    | extracellular space                            | NC                 |
| $1.53 \times 10^{-7}$             | 23                      | 91.30%                       | <u><b><math>2.8 \times 10^{-4}</math></b></u> | KEGG               | Complement and coagulation cascades            | NC                 |
| $2.61 \times 10^{-6}$             | 83                      | 69.90%                       | <u><b><math>3.1 \times 10^{-3}</math></b></u> | TF                 | M00790_2 (HNF-1)                               | n.d.               |
| $1.68 \times 10^{-8}$             | 33                      | 72.70%                       | <u><b><math>2.7 \times 10^{-2}</math></b></u> | TF                 | M00132_3 (HNF-1)                               | n.d.               |
| $8.18 \times 10^{-12}$            | 32                      | 75.00%                       | <u><b><math>1.5 \times 10^{-2}</math></b></u> | TF                 | M01011_1 (HNF1)                                | n.d.               |
| <b>biased to CGI genes</b>        |                         |                              |                                               |                    |                                                |                    |
| $2.06 \times 10^{-6}$             | 401                     | 37.20%                       | <u><b><math>4.7 \times 10^{-9}</math></b></u> | GO:CC              | cytoplasm                                      | NC                 |
| $8.65 \times 10^{-8}$             | 313                     | 38.30%                       | <u><b><math>9.8 \times 10^{-8}</math></b></u> |                    | cytoplasmic part                               | NC                 |
| $1.55 \times 10^{-6}$             | 108                     | 32.40%                       | <u><b><math>2.4 \times 10^{-5}</math></b></u> |                    | mitochondrion                                  | NC,CGI             |
| $5.03 \times 10^{-6}$             | 58                      | 32.80%                       | <u><b><math>2.0 \times 10^{-3}</math></b></u> |                    | mitochondrial part                             |                    |
| $7.34 \times 10^{-10}$            | 526                     | 46.80%                       | <u><b><math>8.1 \times 10^{-3}</math></b></u> | GO:MF              | catalytic activity                             | NC                 |

\* $\chi$ -square tests were applied to examine the difference in the proportions of CGI-containing and CGI-lacking genes for each criterion among all the genes containing T-DMRtags. Percentage of no CGI genes among 1817 genes carrying T-DMRtags is 53.6%. Statistically significant (less than 5%) are designated by underlined boldface.

\*\*Ontology types of GO:BP, GO:CC, and GO:MF indicate biological process, cellular component, and molecular function in Gene Ontology criteria, respectively. KEGG and TF represent KEGG pathway database, and TRANSFAC database, respectively.

<sup>#</sup>The DAVID column indicates the over-representation of the terms in DAVID analysis among all genes classified into the same criterion according to the position of CGIs. NC: non CGI genes, CGI: CGI genes, n.d.: not determin



Supplementary Table S3. List of adaptors and primers

| Name         | Sequence                       | Genomic location of PCR * | Description          |
|--------------|--------------------------------|---------------------------|----------------------|
| R24          | AGCACTCTCCAGCCTCTCACCGCT       |                           | R-Adaptor pairs      |
| R10          | CGAGCGGTGA                     |                           | R-Adaptor (NotI)     |
| R12          | GGCCAGCGGTGA                   |                           | R-Adaptor (NotI)     |
| N24          | AGGCAACTGTGCTATCCGAGGGAA       |                           | N-Adaptor pairs      |
| Ncg10        | CGTTCCTCG                      |                           | N-Adaptor pairs      |
| N18          | GGCAACTGTGCTATCCGA             |                           | LM-PCR               |
| R182         | GCACTCTCCAGCCTCTCA             |                           | LM-PCR               |
| Gnmt_F1      | ACTACAACCCCAACCTTACTAAAA       | chr17:46196405-46196775   | Fig. 2D Gnmt-1       |
| Gnmt_R1      | TGGTTGTTAGGATTTGAATTTAGGA      |                           |                      |
| Gnmt_F2      | AGGTAGTAAGTTTGGTTTTGGGTTT      | chr17:46192018-46192480   | Fig. 2D Gnmt-2       |
| Gnmt_R2      | TCCCATAACCCATACTACCTAATAA      |                           |                      |
| Gnmt_F3      | AATTGGGGTAAAGTTTGTGTTTGTAG     | chr17:46189976-46190462   | Fig. 2D Gnmt-3       |
| Gnmt_R3      | TCCCAAAAACACATAAAAACTCATT      |                           |                      |
| Hnf1a_F      | GGGAGTTAGAGGTAGGAAAATTAGG      | chr5:115232432-115232905  | Fig. 4A Hnf1a        |
| Hnf1a_R      | AAAATAAATCACTACACCTCAATCC      |                           |                      |
| Hnf4a_F1     | GTTTGTGATAGGGTTTGGGAATTAT      | chr2:163230407-163230741  | Fig. 4B Hnf4a-1      |
| Hnf4a_R1     | CTTTCATTTAAACAACACATTCCA       |                           |                      |
| Hnf4a_F2     | GGTTTTTGGTGGTTTTTGTAGAGATTT    | chr2:163231804-163232291  | Fig. 4B Hnf4a-2      |
| Hnf4a_R2     | AAAACCATTAACCTCTCCACACATA      |                           |                      |
| Hnf4a_F3     | GGGAGGGGTATGTATTGTGTAAGTA      | chr2:163237981-163238371  | Fig. 4B Hnf4a-3      |
| Hnf4a_R3     | ACAAACACCCCAACAACAACTAACATT    |                           |                      |
| Hnf4a_F4     | AAAAATCAATCTATCCAACATAACC      | chr2:163239167-163239466  | Fig. 4B Hnf4a-4      |
| Hnf4a_R4     | TGAAGTTGGGATATAAATTTAAAAAGG    |                           |                      |
| Hnf4a_F5     | TTTGTGTTGGTGGTTTTGTATGGTA      | chr2:163239647-163240004  | Fig. 4B Hnf4a-5      |
| Hnf4a_R5     | AACCAACTCAAAAACACATATACCC      |                           |                      |
| Nr1h3_F      | TTAGGAAGAGATGTTTTGTGGTTG       | chr2:90994114-90994508    | Fig. 4C Nr1h3        |
| Nr1h3_R      | CCACTACCCAACATAACATCAAAA       |                           |                      |
| Nr1i2_F      | AGATTGGTTTTGTAGGTGGTTATTG      | chr16:38212169-38212611   | Fig. 4D Nr1i2        |
| Nr1i2_R      | AAAAACCTAACTCCTTCCCTAAAA       |                           |                      |
| Rxra_F1      | TTGGATAGGTTTGGTATTGTTTGT       | chr2:27525521-27525845    | Fig. 4E Rxra-1       |
| Rxra_R1      | CACAAATCACTCTTTAAAAACACCA      |                           |                      |
| Rxra_F2      | AAGTGTAGGATTGGAGGGAAAGTATT     | chr2:27527859-27528199    | Fig. 4E Rxra-2       |
| Rxra_R2      | ATCTCCAAAATCACACATCCTTAAA      |                           |                      |
| C1r_F1       | GGGAAGGTTTGTGTTTTATGAAGATT     | chr6:124475717-124476066  | Fig. S3A C1r-1       |
| C1r_R1       | ACCTTAAACTTATAATCCTTCTACCTCAAC |                           |                      |
| C1r_F2       | AAGGTTATTGTTAAGGGGAGATTGT      | chr6:124477322-124477721  | Fig. S3A C1r-2       |
| C1r_R2       | CATCTTTTCCCTAAACATATAATCAACTC  |                           |                      |
| Proc_F1      | ATTGTAAGATTGTGAAGGATTGTGG      | chr18:32280721-32281125   | Fig. S3A Proc-1      |
| Proc_R1      | CTAATATCCCCCAAAACCAATAAAAC     |                           |                      |
| F2_F1        | GATGGATTTTGTGAATTGTGTGTGA      | chr2:91439647-91440086    | Fig. S3A F2-1        |
| F2_R1        | AACACCATCCAACCTCTAACTTACA      |                           |                      |
| F2_F2        | TGTTAGGGGTGGATATTTGTTTTTA      | chr2:91436998-91437368    | Fig. S3A F2-2        |
| F2_R2        | ACCTACACCACACACATAACTCCTT      |                           |                      |
| Fga_F1       | TGTATTAGTTGGGGAATATAGGAGGT     | chr3:83108768-83109144    | Fig. S3A Fga-1       |
| Fga_R1       | CAACCAAAAATTCACACATTTAACA      |                           |                      |
| Fga_F2       | GGAGGAATAAGGGGTTATATTTATTTT    | chr3:83110480-83110781    | Fig. S3A Fga-2       |
| Fga_R2       | CCAAATCTAAATCTCAAAACAAACAA     |                           |                      |
| Fga_F3       | TGAATTTTTATTAGAAGGAGGAGGA      | chr3:83114472-83114909    | Fig. S3A Fga-3       |
| Fga_R3       | TTCCAAATAAATCCAAACTCAAAAA      |                           |                      |
| Fgb_F1       | TTTGTGTTGGGGTTATTAGATAATTT     | chr3:83137743-83138091    | Fig. S3A Fgb-1       |
| Fgb_R1       | ACCAAATTAACAAATCCAACCTCA       |                           |                      |
| Fgb_F2       | TGGTTTATGAGAAGTGATAAAAGAAAA    | chr3:83136383-83136693    | Fig. S3A Fgb-2       |
| Fgb_R2       | CCCAAAATCTCAATTTCTACCCTA       |                           |                      |
| Fgb_F3       | GAGTTTGGTAAGAAAGGTGTAAGG       | chr3:83134219-83134562    | Fig. S3A Fgb-3       |
| Fgb_R3       | TTCATATTAACCAATAATCTTCATCAA    |                           |                      |
| F9_F1        | GTAAGTTTTATTAGTTTGTATTTGGAA    | chrX:56346175-56346555    | Fig. S3A F9-1        |
| F9_R1        | ATAAAAATACACCACAAACCCCTAT      |                           |                      |
| Serpina1e_F1 | TTTTTGGGAGTAGGGGTAATATAGG      | chr12:104357440-104357836 | Fig. S3A Serpina1e-1 |
| Serpina1e_R1 | ACACAAATCTCCAAACCACTATAC       |                           |                      |
| Serpina1e_F2 | TAGGTGTTTTTGGGAGTTTTGAATA      | chr12:104356571-104356882 | Fig. S3A Serpina1e-2 |
| Serpina1e_R2 | CCAAACAACTAAATCACATTCTCA       |                           |                      |
| Serpind1_F1  | TGATTTTATGTAAGTTGGGTGAGTG      | chr16:17247783-17248189   | Fig. S3A Serpind1-1  |
| Serpind1_R1  | AAATCCAAATTTCTACCCAATAACT      |                           |                      |
| Cpt2_F1      | TTTGATAAGGATAGGTTTGTAAATGTT    | chr4:107421333-107421793  | Fig. S3C Cpt2-1      |
| Cpt2_R1      | ACTAAAACCTCCAAAACAAAC          |                           |                      |
| Cpt2_F2      | GGTTGTGAGTTTAAAGTTTGTGTTTAT    | chr4:107419415-107419712  | Fig. S3C Cpt2-2      |
| Cpt2_R2      | CCTCAAAATTAACCACTCCTTACCAAAT   |                           |                      |
| Gstz1_F1     | GGAGGGAGGTTATTAGTTTAAATTTT     | chr12:88036830-88037318   | Fig. S3C Gstz1-1     |
| Gstz1_R1     | CATCTTTCCCTTACCTTTAATAC        |                           |                      |
| Gstz1_F2     | TTTAAGTTATTGTTGGAATGGAGTTG     | chr12:88037537-88037932   | Fig. S3C Gstz1-2     |
| Gstz1_R2     | AAACACTAACAAACAAACCACTAAC      |                           |                      |
| Pygl_F1      | GAGGTAATGGTTTTATTGGGAATTT      | chr12:71146232-71146507   | Fig. S3C Pygl-1      |
| Pygl_R1      | ACTAACCTCCTCCCTTCTTACTTA       |                           |                      |
| Pygl_F2      | GTTGTATGATGGTTTTGTGGAAT        | chr12:71144064-71144491   | Fig. S3C Pygl-2      |
| Pygl_R2      | CAACAAACCTATAAACCTCTCAAC       |                           |                      |
| Ahcy_F1      | TATATGTGTTTGGGTGTTTTGTTT       | chr2:154763215-154763572  | Fig. S3C Ahcy-1      |
| Ahcy_R1      | ACCCACTCCTATCTACCAACTATT       |                           |                      |

## ***Legends for Supplementary Figures***

### ***Figure S1***

Selective amplification of DNA fragments by D-REAM. **(A)** Genomic DNA was digested with HpyCH4IV and subsequently ligated with the unphosphorylated R-adaptor pairs. The complementary strand of the ligated R24 were filled-in by using Klenow fragments of DNA polymerase I. The DNA fragments were then digested with TaqI and ligated with the unphosphorylated N-adaptor pairs (**Supplementary Table S2**). By complete fragment denaturation and hot-start Taq DNA polymerase, only strands obtained from fragments digested with HpyCH4IV can be used as templates for PCR with the N18 and R18 primers (indicated by the red dotted oval). **(B)** Monitoring selective amplification of HpyCH4IV digested fragments. The PCR mixture with different primer sets was sampled at different cycles of the thermal cycles (15, 20 and 25) and was subjected to agarose gel electrophoresis. **(C)** Selective amplification of NotI digested fragments. Genome DNA, which was digested by NotI instead of HpyCH4IV, was performed by D-REAM. The positions of the DNA molecular markers (M) of 0.5, 1, and 2 kbp are indicated along the sides of the figure. **(D)** The correlation of intensities of the probes between an experimental duplicated liver DNA samples of a mouse.

### ***Figure S2***

*in silico* analysis of mouse genome. **(A)** Steep peaks of HpaII (narrow blue), CpG dinucleotides (blue) and the GC percentage (gray) at TSS indicated that HpaII mainly localized in the CGI on promoter array, and agree the large quantity of tiny fragments. The frequencies of probes (green), HpyCH4IV (red) of the genomic regions, which were covered by the mouse promoter tiling array, are plotted. Dotted horizontal lines at CpG (obs/exp) 0.6 and GC percentage 50% represent the cutoff values for defining CpG islands. **(B)** The mouse genome (mm8, UCSC genome browser) was digested *in silico* with HpyCH4IV (upper panel) or HpaII (lower panel) by using the EMBOSS software package. The distribution of the length of fragments was plotted. The median and average sizes of HpyCH4IV and HpaII fragments were 907, 1468, 658 and 1620 bp, respectively. These plots

indicated that the range of distribution of HpyCH4IV fragments size is narrower than that of HpaII. The first quantile of sizes of HpaII fragments indicate the presence of large quantities of tiny fragment. On the other hands, the average sizes of them are larger than those of HpyCH4IV, indicating that HpyCH4IV is distributed throughout genome in more uniform manner than HpaII.

### **Figure S3**

COBRA confirmed the methylation status of T-DMRtags. **(A)** The methylation status of T-DMRtags of the non-CGI genes involved in the coagulation and complement cascades are shown as plots displayed by the integrated genome browser (IGB) indicating T-DMRtags as arrowheads, and the chromosomal locations are indicated at the top of the panels. The regions indicated as yellow boxes were analyzed by restriction mapping. **(B)** The numbers at the top of the gel images correspond to those on the plots. L and C indicate liver and cerebral DNA, respectively. + and – indicate digestion with HpyCH4IV and no digestion, respectively. **(C)** The methylation status of T-DMRtags and CGIs in CGI genes. **(D)** Agarose electrophoresis gel images are displayed.

### **Figure S4**

The list of candidate genes under the control of HNF1 and DNA methylation. **(A)** Forty-three of mouse orthologs of human genes that had been identified by ChIP-chip experiment of hepatocytes with anti-HNF1 antibody have T-DMRs. **(B)** Genes displayed in shadowed rectangle are classified to have HNF-1A motifs in 1-kb upstream regions of TSSs by MAPPER database. Those in list A are omitted from list B.

### **Figure S5**

Tissue specificity of genes clustered by K-means clustering according to the methylation status of T-DMRs. **(A)** The expression levels of the genes in each cluster of **Figure 5E** are expressed in box-plot of the log-ratios (base = 2) of expression levels in tissues compared to those in the liver. The expression data were downloaded from SymAtlas web site. **(B)** The methylation status of T-

DMRs of the genes are shown as plots displayed in MATscores, which were obtained by MAT using cerebrum as control samples, by the integrated genome browser (IGB)..

***Figure S6***

Data flow of bioinformatics analysis in this study. Rectangles with right corners stand for public domain or raw data. Rhombuses and rectangles in round corners represent software and treated data, respectively.
